# Supplementary material for: Synthesis and properties of MFI zeolites with microporous, mesoporous and macroporous hierarchical structures by a gel-casting technique
Source: Royal Society of Chemistry journal article supplement (doi:10.1039/c5nj03387j), 2016-01-01
Supplement: c5nj03387j1.pdf [file c5nj03387j1.pdf]

## Supporting Information of

# The Synthesis and Properties of MFI Zeolites with Microporous, Mesoporous and Macroporous Hierarchical structures by a Gel-casting Technique

Ying Wang<sup>a</sup>, Runwei Wang<sup>a</sup>, Diou Xu<sup>a</sup>, Chuanyin Sun<sup>a</sup>, Ling Ni<sup>a</sup>, Weiwei Fu<sup>b</sup>, Shangjing Zeng<sup>a</sup>, Shang Jiang<sup>a</sup>, Zongtao Zhang<sup>\*a</sup> and Shilun Qiu<sup>\*a</sup>

<sup>a</sup> College of Chemistry and State Key Laboratory of Inorganic Synthesis and Preparative Chemistry, Jilin University, Changchun 130012, China. E-mail: rwwang@jlu.edu.cn; Fax: +86 431 85168115; Tel: +86 431 85168115

<sup>b</sup> Experimental Center of Shenyang Normal University, Liaoning Shenyang 110034, P. R. China

## Further Characterisation Information.

### DTA and TG

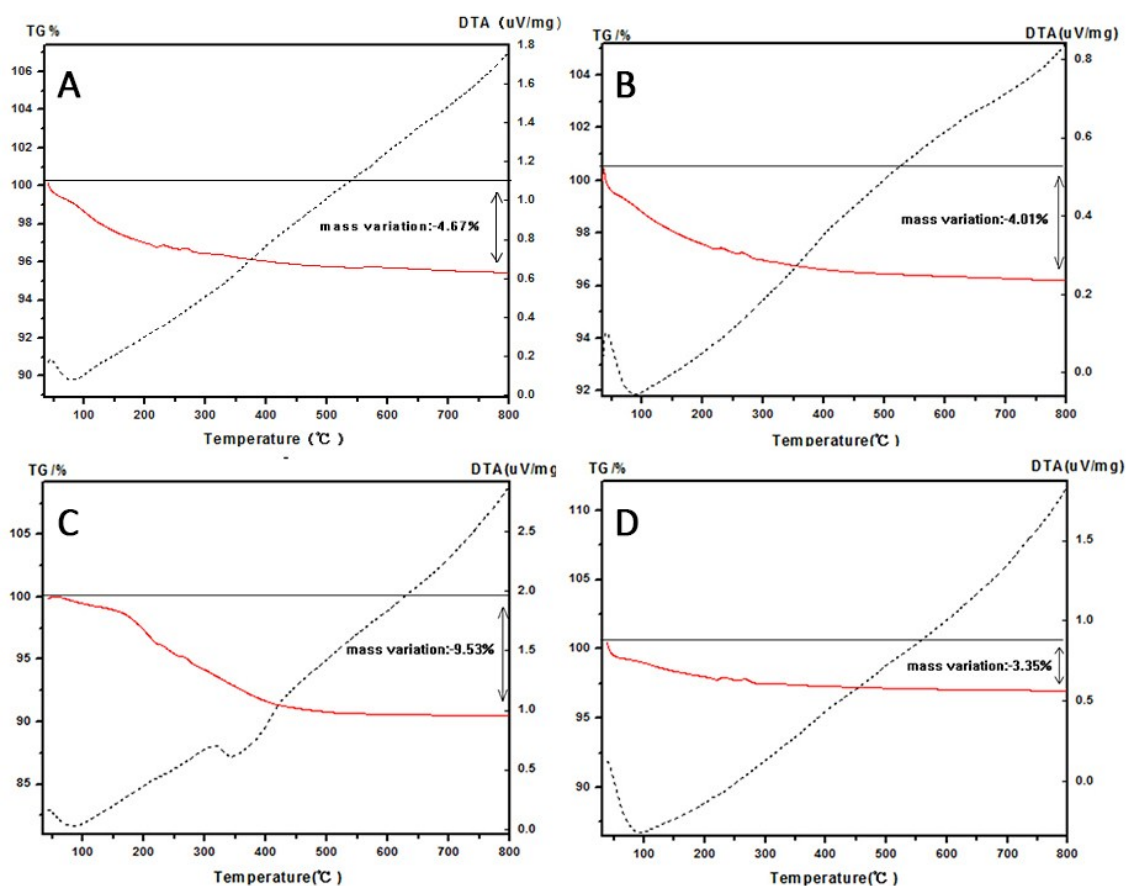

**Figure.S1.** TG-DTA curves of (A) ZSM-5, (B) A-ZSM-5, (C) G-ZSM-5 and (D) calcined G-ZSM-5.

## Catalytic cracking reactions of 1,3,5- triisopropylbenzene

**Table 1S:** Catalytic Activities in Cracking of 1, 3, 5-Triisopropylbenzene on Various Catalysts<sup>a</sup>.

| Catalyst | Conversion% | Reaction temperature | Selectivity,% |         |      |      |      |        |
|----------|-------------|----------------------|---------------|---------|------|------|------|--------|
|          |             |                      | Propylene     | Benzene | IPB  | MIPB | PIPB | others |
| HZSM-5   | 25.9        | 400                  | 29.8          | 15.6    | 10.8 | 31.3 |      | 12.5   |
| HZSM-5   | 1.7         | 250                  |               |         |      |      |      |        |
| Beta     | 2.7         | 250                  |               |         |      | 100  |      |        |
| Beta     | 7.5         | 300                  |               |         | 11.7 | 75   | 13.3 |        |
| Beta     | 10.2        | 350                  |               | 5.2     | 13.5 | 69.6 | 11.7 |        |
| MCM-41   | 62.5        | 400                  | 36.4          | 13.2    | 22.6 | 16.1 | 4.9  | 6.8    |
| G-ZSM-5  | 60          | 320                  | 56.9          | 13.6    | 0.5  | 29   |      |        |
| G-ZSM-5  | 26.7        | 250                  | 48.7          | 8.2     | 1.3  | 41.9 |      |        |
| G-ZSM-5  | 13.7        | 200                  | 31.5          | 6.4     | 7.8  | 54.3 |      |        |

<sup>a</sup> The data of HZSM-5 and MCM-41 was from Qi Jian<sup>46</sup>, performed under the following condition: the volume of 1, 3, 5-TIPB was 1.0  $\mu$ L and the catalysts dosages were 60 mg. In comparison to that, Our data condition is that the volume of 1, 3, 5-TIPB was 0.4  $\mu$ L and the catalysts dosages were 50 mg, and the Beta was from Li Jun-Hua<sup>47</sup>.

Note: IPB, MIPB, and PIPB denote isopropylbenzene, m-diisopropylbenzene, and p-diisopropylbenzene, respectively.

## Catalytic cracking reactions of Hexane

**Table 2S:** Catalytic Activities in Cracking of Hexane on Various Catalysts.

| Catalyst | Conversion% | Reaction temperature |
|----------|-------------|----------------------|
| HZSM-5   | 2.2         | 400                  |
| MCM-41   | 0           | 400                  |
| G-ZSM-5  | 5.33        | 400                  |
